# Supplementary material for: Inulin protects against the harmful effects of dietary emulsifiers on mice gut microbiome
Source: PeerJ. 2024 Mar 21;12:e17110. doi: 10.7717/peerj.17110 (PMC10961058; doi:10.7717/peerj.17110)
Supplement: Supplemental Information 5 [file peerj-12-17110-s005.xlsx]

## Sheet: Sayfa1
Group	Sample	Weight for initial	Weight (week 12)	Weight change (0 to 12 week)	Serum IL-6	Serum IL-10	Fecal lipocalin-2	Mean food consumption for one mice per group (g/day)	Mean water consumption for one mice per group (ml/day)
Kontrol	K	17	28	64.71	107.4	242.1	4.72
Kontrol	K2	14	27.5	96.43	117.4	248.4	4.8
Kontrol	K3	15.5	30	93.55	94.57	246.9	7.02
Kontrol	K4	17	27	58.82	107.9	342.4	0.55
Kontrol	K5	20.5	27	31.7	97.52	232	9.78
Kontrol	K6	16.5	29.5	78.79	110	255.6	1.17
CMC	A1	13	25	92.31	85.91	179	7.63
CMC	A2	19	27	42.11	88.25	173.5	8.69
CMC	A4	16.5	24	45.45	117.2	191.5	9.08
CMC	A5	17	29.5	73.53	99.85	127.7	16.2
CMC	A6	15	26	73.33	98.37	188.6	7.29
CMC	A7	16	27.5	71.87	88.45	216.9	9.12
Lesitin	B1	17	25	47.06	114.8	163.3	6.2
Lesitin	B2	13.5	23.5	74.07	100.9	182.5	2.15
Lesitin	B3	20	27.5	37.5	86.12	163.8	2.42
Lesitin	B4	21	30	42.86	96.68	181.7	12.36
Lesitin	B6	15	24	60	100.7	194.2	4.3
Lesitin	B7	16.5	27	63.64	110	231.3	6.73
CMC+İnülin	C1	17	24.5	44.12	117.6	241.6	4.39
CMC+İnülin	C2	20.5	30	46.34	110.4	203.2	2.09
CMC+İnülin	C3	16.5	26.5	60.61	109.6	221	3.54
CMC+İnülin	C4	19	24	26.32	111.2	255	9.94
CMC+İnülin	C5	15.5	27	74.19	110	309.3	1.94
CMC+İnülin	C6	15	27	80	111	201.6	2.98
Lesitin+İnülin	D1	16.5	24.5	48.48	105.1	189.5	3.4
Lesitin+İnülin	D2	16	25	56.25	111	212.5	2.08
Lesitin+İnülin	D3	18	26.5	47.22	105.3	221	4.23
Lesitin+İnülin	D4	18	26	44.44	104.9	246.3	7.53
Lesitin+İnülin	D5	17	25	47.06	90.1	185.9	9.24
Lesitin+İnülin	D7	15.5	26	67.74	97.1	269.7	11.01
Control-(week1)								3.8	5.92
Control-(week2)								3.14	5.75
Control-(week3)								2.85	5.75
Control-(week4)								3.78	5.79
Control-(week5)								3.5	5.78
Control-(week6)								3.74	8.12
Control-(week7)								4.5	7.77
Control-(week8)								4.28	7.63
Control-(week9)								4.5	8.24
Control-(week10)								4.67	8.64
Control-(week11)								4.5	9.29
Control-(week12)								4.8	8.86
CMC (week1)								3.02	6.4
CMC (week2)								2.66	4.96
CMC (week3)								2.93	7.29
CMC (week4)								3.37	6
CMC (week5)								3.4	6.62
CMC (week6)								3.7	7.2
CMC (week7)								3.57	6.16
CMC (week8)								3.33	6.19
CMC (week9)								3.7	6.9
CMC (week10)								3.8	7.37
CMC (week11)								4.2	7.8
CMC (week12)								4.88	7.87
Lecithin (week1)								3.73	6.43
Lecithin (week2)								2.97	5.65
Lecithin (week3)								3.2	7.43
Lecithin (week4)								3.37	7.37
Lecithin (week5)								3.23	7.07
Lecithin (week6)								4.03	8.7
Lecithin (week7)								3.6	9.66
Lecithin (week8)								3.71	7.46
Lecithin (week9)								3.43	7.4
Lecithin (week10)								3.71	8.78
Lecithin (week11)								3.65	7.8
Lecithin (week12)								3.83	6.95
CMC+inulin (week1)								2.65	7.54
CMC+inulin (week2)								2.32	6.8
CMC+inulin (week3)								2.8	6.2
CMC+inulin (week4)								2.33	6.44
CMC+inulin (week5)								2.58	5.82
CMC+inulin (week6)								4.53	5.6
CMC+inulin (week7)								2.73	6.7
CMC+inulin (week8)								3.4	8.02
CMC+inulin (week9)								2.33	7.33
CMC+inulin (week10)								2.83	5.96
CMC+inulin (week11)								3.71	8.83
CMC+inulin (week12)								3.03	9.17
Lecithin+inulin (week1)								2.3	6.37
Lecithin+inulin (week2)								2.27	6.53
Lecithin+inulin (week3)								2.02	8.35
Lecithin+inulin (week4)								2.56	8.24
Lecithin+inulin (week5)								3.06	7.12
Lecithin+inulin (week6)								3.02	9.65
Lecithin+inulin (week7)								2.63	7.39
Lecithin+inulin (week8)								3.27	8.89
Lecithin+inulin (week9)								3.68	8.45
Lecithin+inulin (week10)								3.7	8.12
Lecithin+inulin (week11)								3.84	5.89
Lecithin+inulin (week12)								3.72	8.05
